# Supplementary material for: Photoelectrochemical-assisted determination of caffeic acid exploiting a composite based on carbon nanotubes, cadmium telluride quantum dots, and titanium dioxide
Source: Royal Society of Chemistry journal article supplement (doi:10.1039/c9ay01422e), 2019-01-01
Supplement: c9ay01422e1.pdf [file c9ay01422e1.pdf]

## Electronic Supplementary Information

### Analytical Methods

#### Photoelectrochemical-assisted determination of caffeic acid exploiting a composite based carbon nanotubes, cadmium telluride quantum dots, and titanium dioxide

Chirlene Nascimento Botelho<sup>a</sup>, Neuma das Mercês. Pereira<sup>b</sup>, Glaura Goulart Silva<sup>b</sup>, Alan Silva de Menezes<sup>c</sup>, Cícero

Wellington Brito Bezerra<sup>a</sup>, Flavio Santos Damos<sup>a\*</sup>, Rita de Cássia Silva Luz<sup>a\*</sup>

<sup>a</sup>Department of Chemistry, Federal University of Maranhão, 65080-805 São Luís, MA, Brazil

<sup>b</sup>Department of Chemistry, Federal University of Minas Gerais, 31270-901 Belo Horizonte, MG, Brazil

<sup>c</sup>Department of Physics, Federal University of Maranhão, 65080-805 São Luís, MA, Brazil

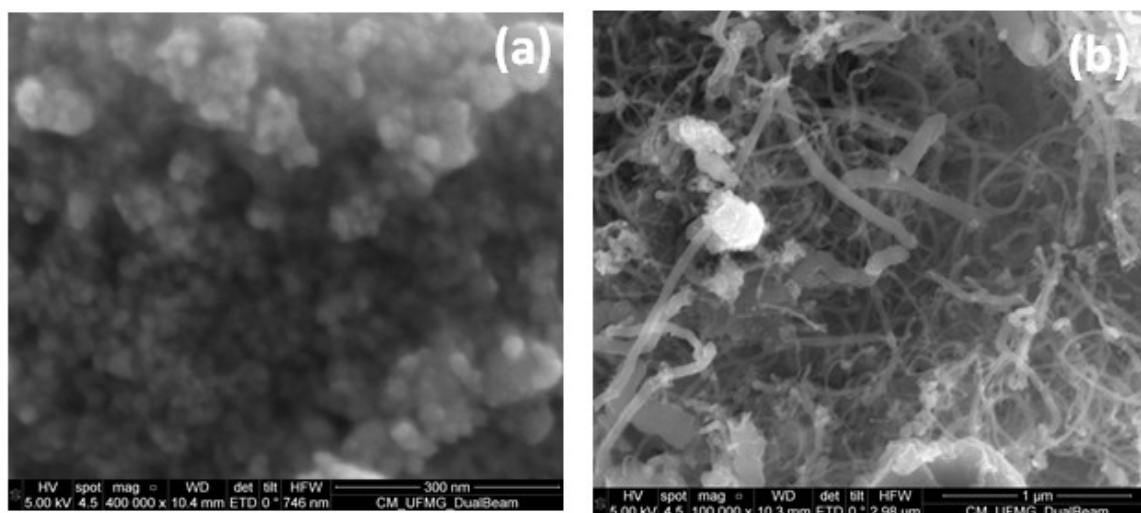

**Figure S1:** SEM images for: (a) TiO<sub>2</sub> nanoparticles 300 nm; (b) carbon nanotubes 1 μm.

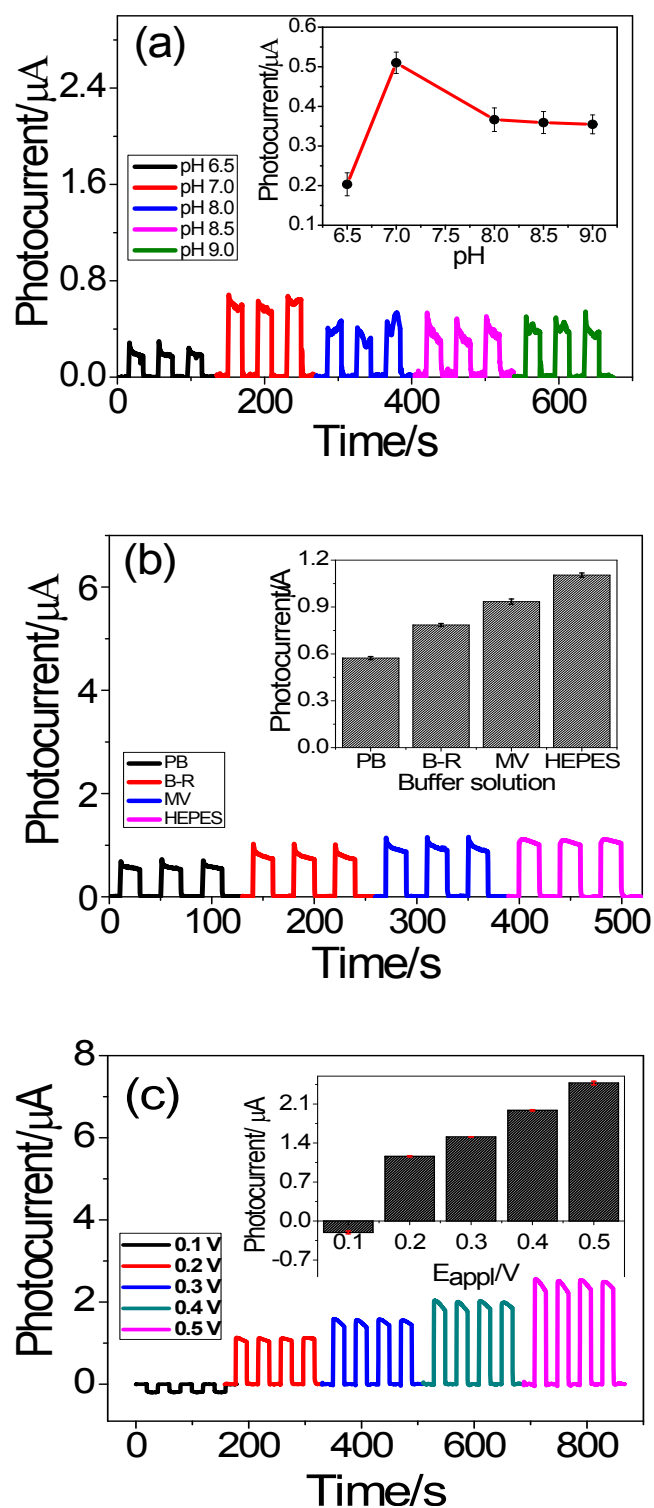

**Figure S2:** Photoelectrochemical response to  $\text{TiO}_2/\text{CNTs}/\text{CdTeQDs}/\text{FTO}$  in different: pH values (a); different buffer solutions (b) ( $E_{\text{appl.}}=+0.2$  V vs.  $\text{Ag}/\text{AgCl}$ ); applied potential (c). Inserted figures: Photocurrent plot in function of analytical parameters.  $[\text{CA}]=200 \mu\text{mol L}^{-1}$ .

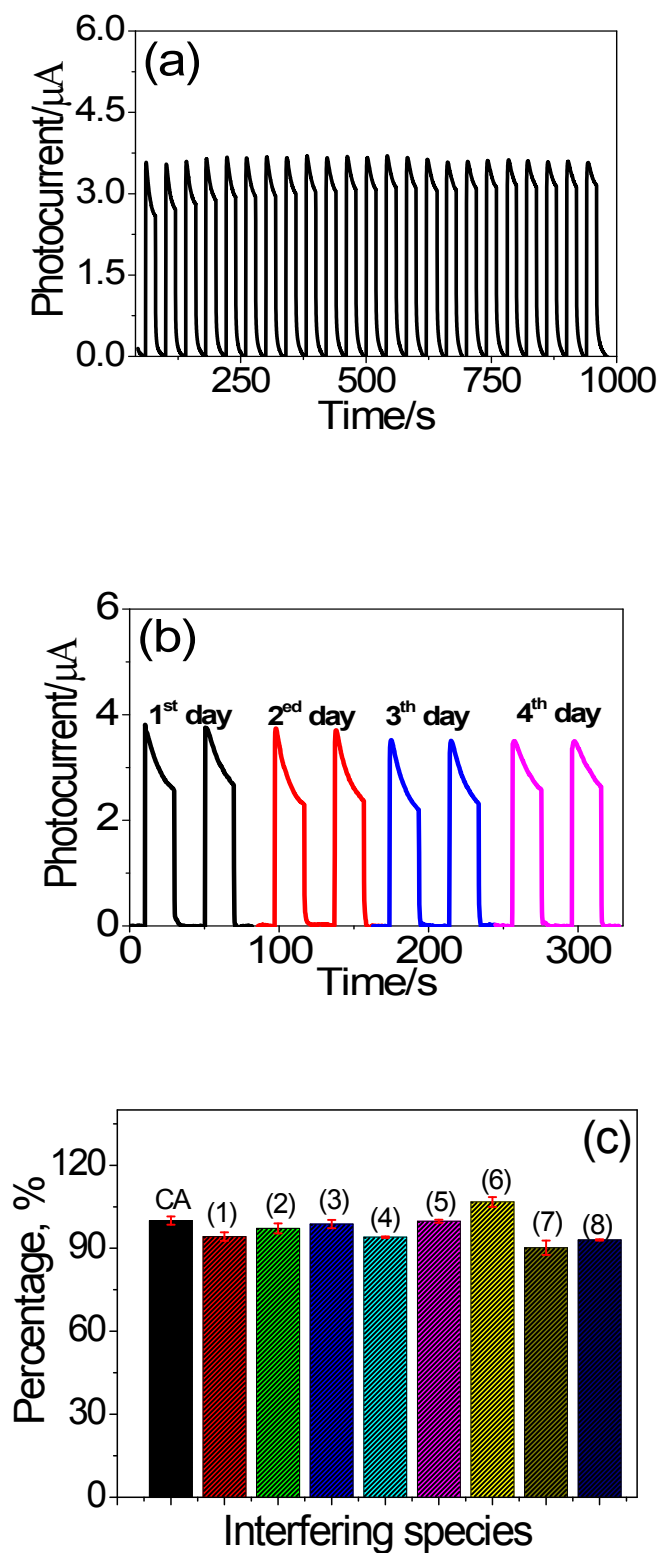

**Figure S3:** Photoelectrochemical response to  $\text{TiO}_2/\text{CNTs}/\text{CdTeQDs}/\text{FTO}$  in the presence of CA obtained: (a) on the same day; (b) on different days; and (c) influence of interfering compounds on the photoelectrochemical response of the sensor. All the experiments were performed in  $0.1\text{mol}\cdot\text{L}^{-1}$  HEPES buffer, pH 7.0.  $E_{\text{appl}} = +0.4\text{ V}$  vs Ag/AgCl. (1) chlorogenic acid; (2) ascorbic acid; (3) tartaric acid; (4) gallic acid; (5) quercetin; (6) caffeic ethyl ester.; (7) vanillic acid; (8) ferulic acid.

**Table S1:** Comparison of analytical parameters obtained by different analytical methods for CA determination.

| Analytical Method | Linear range / $\mu\text{mol L}^{-1}$ | LOD/ $\mu\text{mol L}^{-1}$ | LOQ/ $\mu\text{mol L}^{-1}$ | Reference |
|-------------------|---------------------------------------|-----------------------------|-----------------------------|-----------|
| PEC               | 0.2–110.51 (DPV)                      | 0.13                        |                             |           |
|                   | 110.51–482 (DPV)                      |                             | -                           | 3         |
|                   | 1–520 (amperometry)                   | 0.76                        |                             |           |
|                   |                                       |                             |                             | 5         |
| HPLC              | 5.55–555                              | 1.11                        | 3.33                        |           |
| HPLC              | 0.048–277                             | 0.014                       | 0.048                       | 6         |
| UV-vis            | 0.88–555                              | 13                          | 44                          | 7         |
| Spectroscopy      |                                       |                             |                             |           |
| Capillary         | 11.1–555                              | 2.70                        | 9.44                        | 9         |
| Electrophoresis   |                                       |                             |                             |           |
| Capillary         | 2.77–416                              | 0.27                        | 0.5                         | 10        |
| Electrophoresis   |                                       |                             |                             |           |
| HPLC              | 1.4–21.6                              | 0.15                        | 0.5                         | 31        |
| HPLC-UV           | 55.5–333                              | 7.9                         | 24.3                        | 32        |
| HPLC-UV-vis       | 0.55–138                              | 0.17                        | 0.58                        | 33        |
| Fluorometry       | 0.5–200                               | 0.11                        | -                           | 34        |
| Fluorometry       | 2–350                                 | 0.20                        | -                           | 35        |
| Fluorometry       | 0.14–1.4                              | 0.06                        | -                           | 36        |
| Fluorometry       | 3.71–111.8                            | 1.20                        | -                           | 37        |
| PEC               | 0.50–360 (amperometry)                | 0.15                        | 0.44                        | This work |
